# Supplementary material for: Diffusion-weighted MRI to determine response and long-term clinical outcomes in muscle-invasive bladder cancer following neoadjuvant chemotherapy
Source: PubMed Central journal article supplement (PMC9702046; doi:10.3389/fonc.2022.961393), 2022-11-14
Supplement: DataSheet_1.pdf [file DataSheet_1.pdf]

## Supplementary Material

**Table.1 Categorisation of NAC response based on conventional assessment**

| Response status      |          | Pathological     | Clinical<br>(Endoscopic, and or<br>EUA)                | Radiological (CT,<br>and or MRI) |
|----------------------|----------|------------------|--------------------------------------------------------|----------------------------------|
| <b>Response</b>      | Complete | pCR (T0)         | cCR                                                    | rCR                              |
|                      | Partial  | pPR ( $\leq$ T1) | cPR                                                    | rPR                              |
| <b>Poor response</b> | Poor     | $\geq$ T2        | No response, or<br>evidence of clinical<br>progression | PD,<br>or persistent $\geq$ T2   |

Abbreviations; pCR pathological complete response, pPR pathological partial response, cCR clinical complete response, rCR radiological complete response, rPR radiological partial response, PD disease progression

## Supplementary Material

**Table 2 . Summary of imaging protocol used**

| *Parameter                                                           |                                                     |                                                     |                                                   |
|----------------------------------------------------------------------|-----------------------------------------------------|-----------------------------------------------------|---------------------------------------------------|
| 1.5T MRI system                                                      | Intera; Philips<br>Healthcare, Best,<br>Netherlands | Avanto; Siemens<br>Healthcare, Erlangen,<br>Germany | Aera; Siemens<br>Healthcare, Erlangen,<br>Germany |
| Pulse sequence                                                       | single- shot, echo planar<br>imaging                | single- shot, echo planar<br>imaging                | single- shot, echo planar<br>imaging              |
| TE/TR (ms)                                                           | 62/3637                                             | 72/3200                                             | 72/4400                                           |
| Number of averages                                                   | 3                                                   | 4                                                   | 3                                                 |
| FOV (mm)                                                             | 400x400                                             | 219x178                                             | 219x184                                           |
| FOV technique                                                        | fFOV                                                | sFOV                                                | sFOV                                              |
| Acquisition matrix                                                   | 112x110                                             | 138x112                                             | 138x116                                           |
| Reconstruction matrix                                                | 256x256                                             | 276x224                                             | 138x116                                           |
| Slice thickness (mm)                                                 | 7                                                   | 5                                                   | 5                                                 |
| Inter slice thickness<br>(distance factor)                           | 0.7                                                 | 0                                                   | 0                                                 |
| Parallel imaging                                                     | SENSE                                               | ISOTROPIC                                           | GRAPPA                                            |
| Orientation                                                          | Axial                                               | Axial                                               | Axial                                             |
| Phase encode direction                                               | AP                                                  | AP                                                  | AP                                                |
| Receiver bandwidth (Hz<br>per pixel)                                 | 1880                                                | 1725                                                | 1295                                              |
| b values (s/mm <sup>2</sup> )                                        | 0, 50,100,250,500 and<br>750                        | 0, 50,100,250,500 and<br>750                        | 0, 50,100,250,500 and<br>750                      |
| Total number and<br>directions of diffusion<br>sensitising gradients | Trace-weighted images<br>3                          | Trace-weighted images<br>3                          | Trace-weighted images<br>3                        |
| Fat suppression                                                      | SPAIR                                               | SPAIR                                               | SPAIR                                             |

\*The total MR acquisition protocol is 35 minutes of which the DWI acquisition time was approximately 7 minutes.

Abbreviations T, Tesla field strength; TE Time to echo; TR repetition time; FOV field of view

## Supplementary Material

**Table 3. ADC histogram parameters in responders and non-responders to neo-adjuvant chemotherapy**

| Parameter                   | Response (n=38) |       |        |              |       |       |         | Poor response (n=10) |              |       |        |              |       |       |  |          |
|-----------------------------|-----------------|-------|--------|--------------|-------|-------|---------|----------------------|--------------|-------|--------|--------------|-------|-------|--|----------|
|                             | Baseline ADC    |       |        | Post NAC ADC |       |       |         | p value*             | Baseline ADC |       |        | Post NAC ADC |       |       |  | p value* |
|                             | Median          | Min   | Max    | Median       | Min   | Max   | Median  |                      | Min          | Max   | Median | Min          | Max   |       |  |          |
| <b>ADC<sub>all</sub></b>    |                 |       |        |              |       |       |         |                      |              |       |        |              |       |       |  |          |
| Mean                        | 1.14            | 0.85  | 2.04   | 1.74         | 1.07  | 3.18  | <0.0001 | 1.22                 | 1.07         | 1.56  | 1.40   | 0.93         | 1.83  | 0.037 |  |          |
| 10 <sup>th</sup> percentile | 0.93            | 0.49  | 1.59   | 1.03         | 0.00  | 2.19  | 0.058   | 0.85                 | 0.75         | 1.11  | 1.04   | 0.68         | 1.30  | 0.114 |  |          |
| 25 <sup>th</sup> percentile | 1.11            | 0.62  | 1.85   | 1.23         | 0.00  | 2.42  | 0.001   | 0.98                 | 0.84         | 1.29  | 1.15   | 0.78         | 1.40  | 0.074 |  |          |
| 50 <sup>th</sup> percentile | 1.32            | 0.82  | 2.00   | 1.64         | 1.05  | 3.14  | <0.0001 | 1.14                 | 0.97         | 1.47  | 1.28   | 0.90         | 1.54  | 0.037 |  |          |
| 75 <sup>th</sup> percentile | 1.60            | 0.92  | 2.28   | 2.19         | 1.26  | 4.01  | <0.0001 | 1.35                 | 1.15         | 1.75  | 1.52   | 1.04         | 2.24  | 0.028 |  |          |
| 90 <sup>th</sup> percentile | 1.97            | 1.05  | 2.97   | 2.86         | 1.63  | 5.68  | <0.0001 | 1.79                 | 1.50         | 2.20  | 2.05   | 1.19         | 2.74  | 0.047 |  |          |
| Skew                        | 1.36            | -0.25 | 11.80  | 0.93         | -0.83 | 4.09  | 0.005   | 1.85                 | 1.11         | 2.86  | 1.69   | 1.05         | 9.29  | 0.959 |  |          |
| Kurtosis                    | 3.20            | -0.93 | 194.78 | 1.16         | -1.39 | 21.61 | 0.002   | 5.21                 | 1.77         | 13.52 | 4.71   | 0.84         | 1.45  | 0.575 |  |          |
| <b>ADC<sub>b100</sub></b>   |                 |       |        |              |       |       |         |                      |              |       |        |              |       |       |  |          |
| Mean                        | 1.23            | 0.78  | 1.86   | 1.67         | 0.93  | 2.91  | <0.0001 | 1.09                 | 1.00         | 1.40  | 1.25   | 0.78         | 1.60  | 0.059 |  |          |
| 10 <sup>th</sup> percentile | 0.82            | 0.33  | 1.34   | 0.90         | 0.00  | 2.05  | 0.126   | 0.74                 | 0.64         | 1.05  | 0.91   | 0.54         | 1.27  | 0.093 |  |          |
| 25 <sup>th</sup> percentile | 0.98            | 0.56  | 1.58   | 1.11         | 0.00  | 2.32  | 0.001   | 0.88                 | 0.79         | 1.20  | 1.04   | 0.65         | 1.35  | 0.059 |  |          |
| 50 <sup>th</sup> percentile | 1.20            | 0.73  | 1.90   | 1.57         | 0.83  | 2.79  | <0.0001 | 1.03                 | 0.89         | 1.38  | 1.18   | 0.78         | 1.50  | 0.037 |  |          |
| 75 <sup>th</sup> percentile | 1.43            | 0.86  | 2.29   | 2.12         | 1.27  | 3.33  | <0.0001 | 1.24                 | 1.05         | 1.57  | 1.40   | 0.91         | 1.79  | 0.022 |  |          |
| 90 <sup>th</sup> percentile | 1.77            | 0.99  | 2.66   | 2.54         | 1.52  | 4.39  | <0.0001 | 1.55                 | 1.38         | 1.86  | 1.81   | 1.05         | 2.30  | 0.047 |  |          |
| Skew                        | 0.79            | -0.60 | 4.77   | 0.81         | 0.05  | 2.12  | 0.744   | 1.40                 | 0.85         | 3.0   | 1.31   | 0.52         | 2.85  | 0.721 |  |          |
| Kurtosis                    | 1.30            | -0.93 | 54.8   | 0.56         | -1.53 | 6.27  | 0.112   | 3.30                 | 1.61         | 12.42 | 2.64   | 0.35         | 11.99 | 0.878 |  |          |

\*Wilcoxon signed rank test, p values refer to comparison between baseline pre chemotherapy and post chemotherapy in responding and non-responding groups. Mean and percentiles ADC are given in  $\times 10^{-3}$  mm<sup>2</sup>/s. Skew and kurtosis are absolute values

## Supplementary Material

**Table 4. ROC analysis of ADC parameters**

| Parameter                             | Derived from ADC <sub>all</sub> values |             |       |      | Derived from ADC <sub>b100</sub> |             |       |      |
|---------------------------------------|----------------------------------------|-------------|-------|------|----------------------------------|-------------|-------|------|
|                                       | AUC                                    | *p value    | 95%CI |      | AUC                              | *p value    | 95%CI |      |
| <b>Baseline ADC</b>                   |                                        |             |       |      |                                  |             |       |      |
| Mean                                  | 0.56                                   | 0.57        | 0.39  | 0.74 | 0.55                             | 0.66        | 0.37  | 0.73 |
| 10 <sup>th</sup> percentile           | 0.46                                   | 0.71        | 0.26  | 0.66 | 0.47                             | 0.78        | 0.27  | 0.67 |
| 25 <sup>th</sup> percentile           | 0.48                                   | 0.85        | 0.29  | 0.67 | 0.49                             | 0.93        | 0.30  | 0.68 |
| 50 <sup>th</sup> percentile           | 0.59                                   | 0.44        | 0.42  | 0.76 | 0.58                             | 0.47        | 0.41  | 0.76 |
| 75 <sup>th</sup> percentile           | 0.61                                   | 0.35        | 0.44  | 0.77 | 0.59                             | 0.45        | 0.41  | 0.77 |
| 90 <sup>th</sup> percentile           | 0.60                                   | 0.40        | 0.42  | 0.77 | 0.62                             | 0.30        | 0.45  | 0.78 |
| Skew                                  | 0.40                                   | 0.37        | 0.22  | 0.57 | 0.34                             | 0.16        | 0.18  | 0.50 |
| Kurtosis                              | 0.37                                   | 0.25        | 0.20  | 0.54 | 0.31                             | 0.10        | 0.16  | 0.46 |
| <b>Post NAC ADC</b>                   |                                        |             |       |      |                                  |             |       |      |
| Mean                                  | 0.74                                   | <b>0.04</b> | 0.58  | 0.90 | 0.76                             | <b>0.02</b> | 0.61  | 0.90 |
| 10 <sup>th</sup> percentile           | 0.46                                   | 0.71        | 0.28  | 0.63 | 0.46                             | 0.75        | 0.28  | 0.65 |
| 25 <sup>th</sup> percentile           | 0.60                                   | 0.38        | 0.43  | 0.77 | 0.58                             | 0.49        | 0.40  | 0.76 |
| 50 <sup>th</sup> percentile           | 0.75                                   | <b>0.03</b> | 0.59  | 0.90 | 0.76                             | <b>0.02</b> | 0.62  | 0.91 |
| 75 <sup>th</sup> percentile           | 0.80                                   | <b>0.01</b> | 0.65  | 0.96 | 0.80                             | <b>0.01</b> | 0.66  | 0.94 |
| 90 <sup>th</sup> percentile           | 0.75                                   | <b>0.03</b> | 0.60  | 0.89 | 0.75                             | <b>0.03</b> | 0.60  | 0.90 |
| Skew                                  | 0.19                                   | 0.01        | 0.05  | 0.32 | 0.29                             | 0.07        | 0.13  | 0.45 |
| kurtosis                              | 0.26                                   | 0.03        | 0.08  | 0.43 | 0.29                             | 0.06        | 0.11  | 0.46 |
| <b>Absolute ADC change</b>            |                                        |             |       |      |                                  |             |       |      |
| Mean                                  | 0.74                                   | <b>0.04</b> | 0.58  | 0.90 | 0.78                             | <b>0.02</b> | 0.62  | 0.93 |
| 10 <sup>th</sup> percentile           | 0.50                                   | 0.98        | 0.32  | 0.69 | 0.55                             | 0.68        | 0.38  | 0.72 |
| 25 <sup>th</sup> percentile           | 0.67                                   | 0.13        | 0.51  | 0.84 | 0.62                             | 0.29        | 0.45  | 0.80 |
| 50 <sup>th</sup> percentile           | 0.78                                   | <b>0.01</b> | 0.63  | 0.93 | 0.75                             | <b>0.03</b> | 0.59  | 0.90 |
| 75 <sup>th</sup> percentile           | 0.79                                   | <b>0.01</b> | 0.65  | 0.94 | 0.82                             | <b>0.01</b> | 0.69  | 0.95 |
| 90 <sup>th</sup> percentile           | 0.74                                   | <b>0.04</b> | 0.58  | 0.89 | 0.74                             | <b>0.04</b> | 0.59  | 0.89 |
| Skew                                  | 0.29                                   | 0.06        | 0.12  | 0.46 | 0.45                             | 0.68        | 0.29  | 0.62 |
| Kurtosis                              | 0.33                                   | 0.13        | 0.10  | 0.56 | 0.42                             | 0.49        | 0.23  | 0.62 |
| <b>Relative percentage ADC change</b> |                                        |             |       |      |                                  |             |       |      |
| Mean                                  | 0.73                                   | <b>0.04</b> | 0.57  | 0.89 | 0.75                             | <b>0.03</b> | 0.58  | 0.92 |
| 10 <sup>th</sup> percentile           | 0.51                                   | 0.95        | 0.32  | 0.69 | 0.55                             | 0.66        | 0.38  | 0.72 |
| 25 <sup>th</sup> percentile           | 0.67                                   | 0.14        | 0.50  | 0.84 | 0.63                             | 0.26        | 0.45  | 0.80 |
| 50 <sup>th</sup> percentile           | 0.77                                   | <b>0.02</b> | 0.62  | 0.92 | 0.73                             | <b>0.05</b> | 0.55  | 0.90 |
| 75 <sup>th</sup> percentile           | 0.79                                   | <b>0.01</b> | 0.64  | 0.94 | 0.79                             | <b>0.01</b> | 0.65  | 0.94 |
| 90 <sup>th</sup> percentile           | 0.71                                   | 0.06        | 0.55  | 0.87 | 0.71                             | 0.07        | 0.55  | 0.88 |
| Skew                                  | 0.27                                   | 0.04        | 0.11  | 0.42 | 0.31                             | 0.10        | 0.16  | 0.47 |
| Kurtosis                              | 0.29                                   | 0.07        | 0.11  | 0.47 | 0.30                             | 0.09        | 0.15  | 0.46 |

\*Significant results are those with AUC >0.6 p<0.05

## Supplementary Material

**Table 5. Time to event outcomes according to the derived imaging biomarkers**

| Imaging biomarker                                                                                             | Time to event analysis                       |                                             |                                               |                                               |
|---------------------------------------------------------------------------------------------------------------|----------------------------------------------|---------------------------------------------|-----------------------------------------------|-----------------------------------------------|
|                                                                                                               | Overall survival                             | Bladder cancer specific survival            | Progression free survival                     | Time to cystectomy                            |
| $\Delta\text{ADC}_{\text{all}}$ mean $>0.18 \times 10^{-3}$ mm <sup>2</sup> /s                                | HR 0.71 (95% CI 0.34-1.49)<br>p=0.37         | HR 0.43 (95% CI 0.14-1.34)<br>p=1.15        | HR 0.58 (95% CI 0.20-1.69)<br>p=0.32          | HR 0.20 (95% CI 0.08-0.51)<br><b>p=0.0008</b> |
| $\Delta\text{ADC}_{\text{b100}}$ mean $>0.19 \times 10^{-3}$ mm <sup>2</sup> /s                               | HR 0.42 (95% CI 0.20-0.89)<br><b>p=0.02</b>  | HR 0.27 (95% CI 0.08-0.84)<br><b>p=0.02</b> | HR 0.26 (95% CI 0.09-0.79)<br><b>p=0.017</b>  | HR 0.36 (95% CI 0.15-0.89)<br><b>p=0.027</b>  |
| % $\Delta\text{ADC}_{\text{all}}$ mean $>18.0\%$                                                              | HR 0.62 (95% CI 0.31-1.23)<br>p=0.17         | HR 0.35 (95% CI 0.12-1.02)<br>p=0.05        | HR 0.31 (95% CI 0.11-0.86)<br><b>p=0.024</b>  | HR 0.35 (95% CI 0.15-0.83)<br><b>p=0.017</b>  |
| % $\Delta\text{ADC}_{\text{b100}}$ mean $>18.1\%$                                                             | HR 0.53 (95% CI 0.27-1.08)<br>p=0.08         | HR 0.25 (95% CI 0.09-0.74)<br><b>p=0.01</b> | HR 0.21 (95% CI 0.07-0.60) p=<br><b>0.004</b> | HR 0.28 (95% CI 0.12-0.67)<br><b>p=0.004</b>  |
| $\Delta\text{ADC}_{\text{all}}$ at the 75 <sup>th</sup> percentile $>0.17 \times 10^{-3}$ mm <sup>2</sup> /s  | HR 0.047 (95% CI 0.20-1.13)<br>p=0.09        | HR 0.46 (95% CI 0.12-1.84)<br>p=0.27        | HR 0.30 (95% CI 0.084-1.04)<br>p=0.06         | HR 0.25 (95% CI 0.09-0.72)<br><b>p=0.010</b>  |
| $\Delta\text{ADC}_{\text{b100}}$ at the 75 <sup>th</sup> percentile $>0.22 \times 10^{-3}$ mm <sup>2</sup> /s | HR 0.31 (95% CI 0.14-0.69)<br><b>p=0.004</b> | HR 0.37 (95% CI 0.11-1.27)<br>p=0.11        | HR 0.13 (95% CI 0.04-0.40)<br><b>p=0.0005</b> | HR 0.29 (95% CI 0.11-0.76)<br><b>p=0.012</b>  |
| % $\Delta\text{ADC}_{\text{all}}$ at the 75 <sup>th</sup> percentile $>13.4\%$                                | HR 0.54 (95% CI 0.24-1.19)<br>p=0.12         | HR 0.48 (95% CI 0.14-1.68)<br>p=0.25        | HR 0.28 (95% CI 0.08-0.91)<br><b>p=0.035</b>  | HR 0.53 (95% CI 0.21-1.33)<br><b>p=0.18</b>   |
| % $\Delta\text{ADC}_{\text{b100}}$ at the 75 <sup>th</sup> percentile $>15.5\%$                               | HR 0.40 (95% CI 0.19-0.86)<br><b>p=0.017</b> | HR 0.26 (95% CI 0.08-0.82)<br><b>p=0.02</b> | HR 0.16 (95% CI 0.05-0.48)<br><b>p=0.0012</b> | HR 0.19 (95% CI 0.07-0.47)<br><b>p=0.0004</b> |

## **Supplementary Material**

### **Comparison of ADC calculation by vendor specific MRI**

In this study 54.2% (26/48) of baseline MRI scans were performed on the Intera system, 39.6% (19/48) on the Aera system and 6.3% (3/48) on the Avanto system. 93.8% (45/48) patients had post NAC MRI performed on the same scanner i.e only 3 patients had post NAC MRI acquired on a different scanner during the follow-up period.

The ADC median values and pair-wise comparison by MRI system at baseline, post NAC, and  $\Delta$ ADC is given in supplementary material Table 6. The  $ADC_{all}$  mean and  $ADC_{b100}$  mean at baseline and post NAC were statistically significant between the Intera and Aera groups on Kruskal-Wallis Test, adjusted by Bonferroni correction for multiple testing. When  $\Delta$ ADC distribution was reviewed, no significant difference was seen between the scanners. Pearson Chi squared analysis demonstrated the distribution of NAC response status was not significantly different between the scanners and is unlikely to be a confounding factor.

Scanner switching for individual patients was avoided wherever possible. Individual patients therefore provide internal control of this variable when  $\Delta$ ADC is considered and that the changes seen with response are large enough to mitigate any scanner differences. However, when absolute  $\Delta$ ADC is summarised between different machines an error is likely to be introduced, as the degree of change between machines is different although not significant.

## Supplementary Material

**Table 6. Comparison of ADC between scanners used in the study**

| MRI system-baseline (number of patients)  | Baseline ADC                                                 |       |      |                                                               |       |      |
|-------------------------------------------|--------------------------------------------------------------|-------|------|---------------------------------------------------------------|-------|------|
|                                           | ADC <sub>all</sub> mean x10 <sup>-3</sup> mm <sup>2</sup> /s |       |      | ADC <sub>b100</sub> mean x10 <sup>-3</sup> mm <sup>2</sup> /s |       |      |
|                                           | median                                                       | range |      | median                                                        | range |      |
| Intera (26)                               | 1.52                                                         | 0.98  | 2.04 | 1.35                                                          | 0.80  | 1.86 |
| Aera (19)                                 | 1.21                                                         | 0.85  | 1.68 | 1.09                                                          | 0.78  | 1.50 |
| Avanto (3)                                | 1.04                                                         | 1.01  | 1.43 | 0.97                                                          | 0.79  | 1.24 |
|                                           | Pair-wise comparison (adjusted significance)*<br>(p value)   |       |      |                                                               |       |      |
| Intera-aera                               | 0.033                                                        |       |      | 0.023                                                         |       |      |
| Intera-avanto                             | 0.121                                                        |       |      | 0.113                                                         |       |      |
| Aera-avanto                               | 1.00                                                         |       |      | 1.00                                                          |       |      |
| MRI system- post NAC (number of patients) | Post NAC                                                     |       |      |                                                               |       |      |
|                                           | ADC <sub>all</sub> mean x10 <sup>-3</sup> mm <sup>2</sup> /s |       |      | ADC <sub>b100</sub> mean x10 <sup>-3</sup> mm <sup>2</sup> /s |       |      |
|                                           | median                                                       | range |      | median                                                        | range |      |
| Intera (25)                               | 1.52                                                         | 0.98  | 2.04 | 1.35                                                          | 0.80  | 1.86 |
| Aera (22)                                 | 1.21                                                         | 0.85  | 1.68 | 1.09                                                          | 0.78  | 1.50 |
| Avanto (1)                                | 1.04                                                         | 1.01  | 1.43 | 0.97                                                          | 0.79  | 1.24 |
|                                           | Pair-wise comparison (adjusted significance)*<br>(p value)   |       |      |                                                               |       |      |
| Intera-aera                               | 0.028                                                        |       |      | 0.022                                                         |       |      |
| Intera-avanto                             | 1.00                                                         |       |      | 1.00                                                          |       |      |
| Aera-avanto                               | 1.00                                                         |       |      | 1.00                                                          |       |      |
| MRI baseline system (number of patients)  | Absolute ADC change                                          |       |      |                                                               |       |      |
|                                           | ADC <sub>all</sub> mean x10 <sup>-3</sup> mm <sup>2</sup> /s |       |      | ADC <sub>b100</sub> mean x10 <sup>-3</sup> mm <sup>2</sup> /s |       |      |
|                                           | median                                                       | range |      | median                                                        | range |      |
| Intera (26)                               | 0.36                                                         | -0.44 | 1.93 | 0.30                                                          | -0.21 | 1.41 |
| Aera (19)                                 | 0.17                                                         | -0.02 | 1.04 | 0.16                                                          | -0.02 | 1.00 |
| Avanto (3)                                | 0.36                                                         | -0.12 | 0.84 | 0.47                                                          | -0.14 | 0.84 |
|                                           | Significance**<br>(p value)                                  |       |      |                                                               |       |      |
| Intera-aera                               | 0.157                                                        |       |      | 0.311                                                         |       |      |
| Intera-avanto                             |                                                              |       |      |                                                               |       |      |
| Aera-avanto                               |                                                              |       |      |                                                               |       |      |

\* Kruskal-Wallis Test, adjusted by Bonferroni correction for multiple testing

\*\* multiple comparisons not performed because no significant difference across samples i.e. distribution of absolute ADC change is same across all categories
